# Supplementary material for: Models of suicide in elderly: a protocol for a systematic review
Source: PubMed Central journal article supplement — BMJ Open. 2018 Oct 18;8(10):e022087. doi: 10.1136/bmjopen-2018-022087 (PMC6196840; doi:10.1136/bmjopen-2018-022087), 2018-10-18
Supplement: bmjopen-2018-022087supp002.pdf [file bmjopen-2018-022087supp002.pdf]

## Appendix 2

### Strategy for SCOPUS and PUBMED.

#### Final syntax in SCOPUS:

(TITLE-ABS(suicid\*) OR TITLE-ABS(death wishes)) OR TITLE ABS(deliberate self-harm1)) AND (TITLE-ABS(model\*) OR TITLEABS(theory) OR TITLE ABS(Framework) OR TITLE ABS(proposal)) AND (TITLE-ABS(old\*) OR ALL(old\*) OR ALL(eld\*) OR ALL(geriatric\*) OR ALL(aging) OR ALL(ageing) OR ALL(age\*) OR ALL("later life") OR ALL(senior) OR ALL(nonagenarian) OR ALL(octogenarian) OR ALL(centenarian)) AND (PUBYEAR < 2017)

#### Our initial search syntax for PubMed will be:

(suicid[tiab] OR death wishes [tiab] OR deliberate self-harm[tiab]) AND (model[tiab] OR theory [tiab] OR Framework [tiab] OR proposal [tiab]) AND (old[tiab] OR old\*[tiab]OR eld\* OR geriatric\* OR aging OR ageing OR age\* OR "later life" OR senior OR nonagenarian OR octogenarian OR centenarian) AND 30-12-2017[dp]
