# Supplementary material for: Models of suicide in elderly: a protocol for a systematic review
Source: PubMed Central journal article supplement — BMJ Open. 2018 Oct 18;8(10):e022087. doi: 10.1136/bmjopen-2018-022087 (PMC6196840; doi:10.1136/bmjopen-2018-022087), 2018-10-18
Supplement: bmjopen-2018-022087supp003.pdf [file bmjopen-2018-022087supp003.pdf]

## Appendix 3

### PRISMA 2009 Flow Diagram

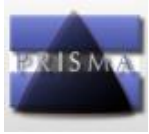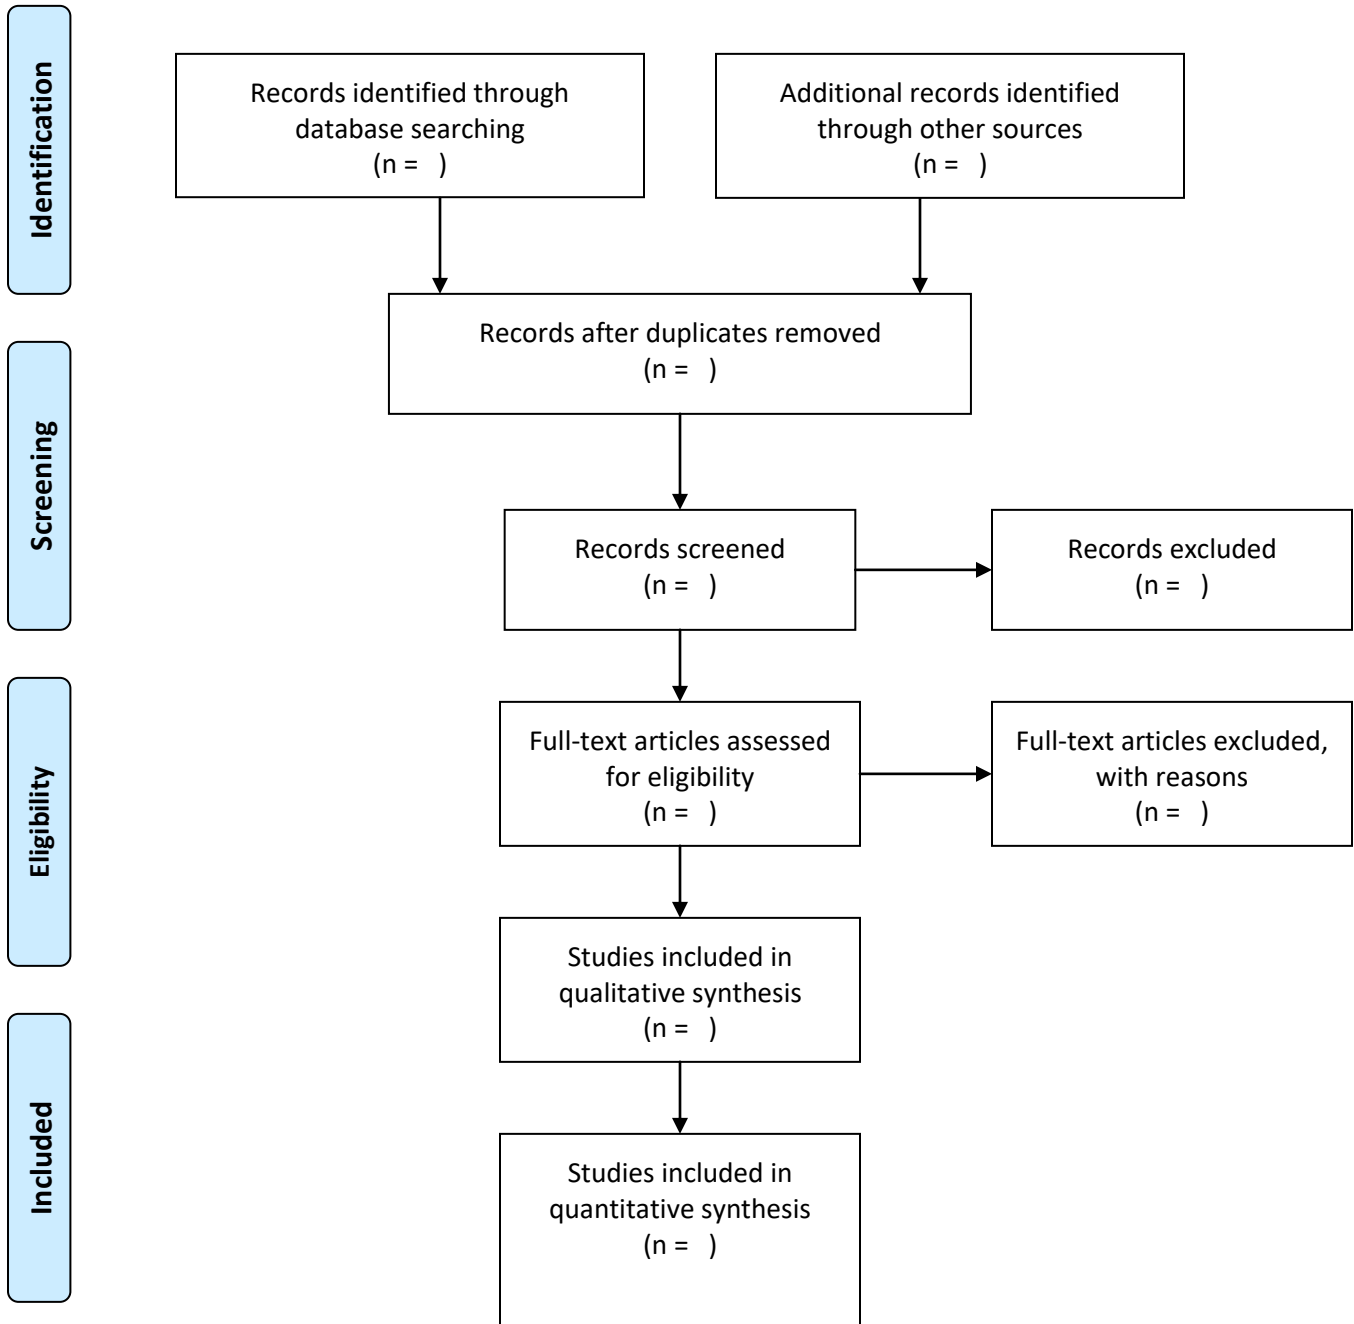

From: Moher D, Liberati A, Tetzlaff J, Altman DG, The PRISMA Group (2009). Preferred Reporting Items for Systematic Reviews and Meta-Analyses: The PRISMA Statement. PLoS Med 6(7): e1000097. doi:10.1371/journal.pmed1000097

For more information, visit [www.prisma-statement.org](http://www.prisma-statement.org).
